# Supplementary material for: A retrospective study of treatment persistence and adherence to α-blocker plus antimuscarinic combination therapies, in men with LUTS/BPH in the Netherlands
Source: PubMed Central journal article supplement (PMC5440896; doi:10.1186/s12894-017-0226-2), 2017-05-22
Supplement: 12894_2017_226_MOESM6_ESM.pdf [file 12894_2017_226_MOESM6_ESM.pdf]

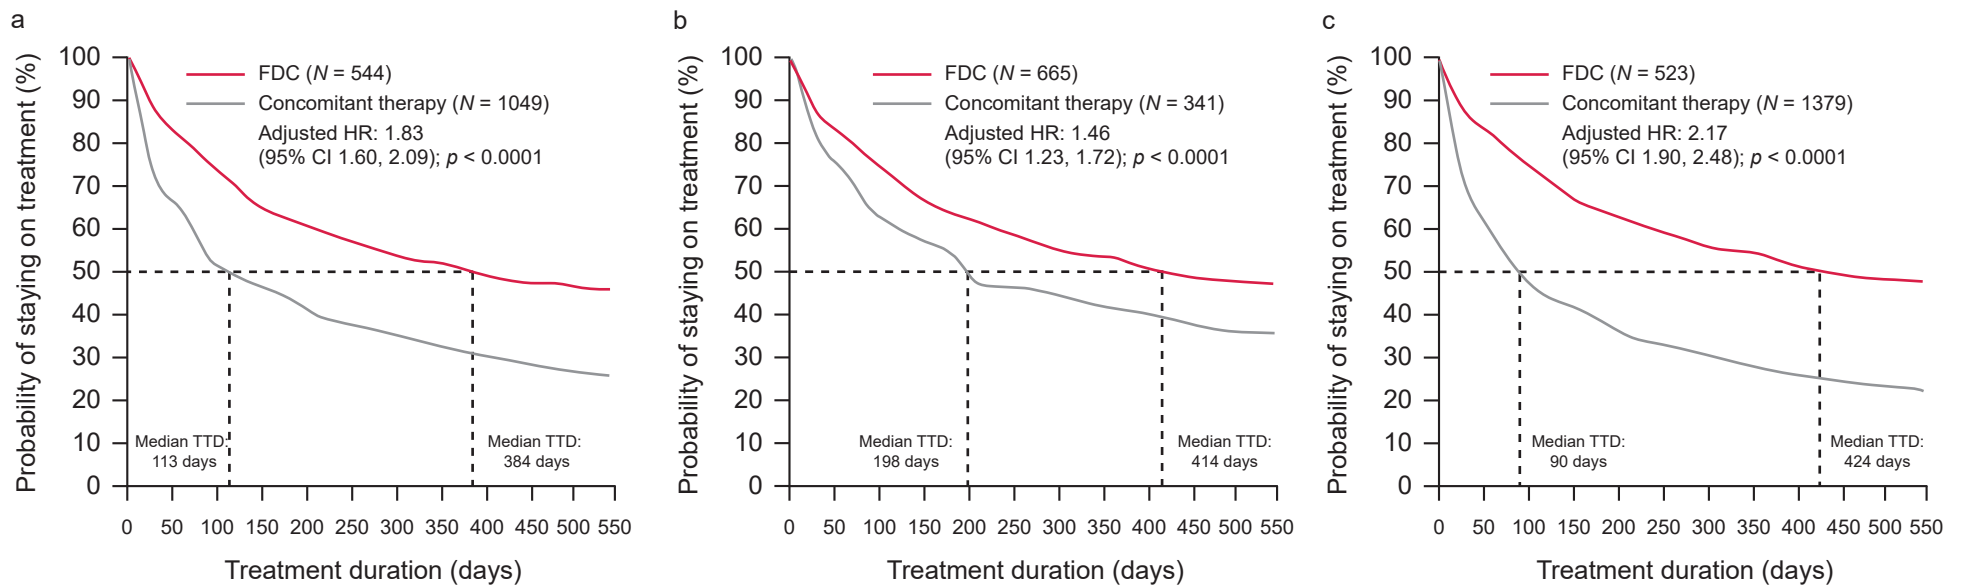

**Figure S2.** Median time to discontinuation: sensitivity analyses of treatment-naïve men (no prior combination therapy)\* (a); index combination first prescribed on the same date\* (b); and men who received an  $\alpha$ -blocker and an antimuscarinic as combination therapy within 60 days<sup>‡</sup> (c).

\*Men who received  $\alpha$ -blocker plus antimuscarinic; <sup>‡</sup>Men who initiated  $\alpha$ -blocker and antimuscarinic combination therapy within a 60 day window. 5-ARI: 5 $\alpha$ -reductase inhibitor; CI: confidence intervals; FDC: fixed-dose combination; HR: hazard ratio; TTD: time to discontinuation
