# Supplementary material for: A retrospective study of treatment persistence and adherence to α-blocker plus antimuscarinic combination therapies, in men with LUTS/BPH in the Netherlands
Source: PubMed Central journal article supplement (PMC5440896; doi:10.1186/s12894-017-0226-2), 2017-05-22
Supplement: 12894_2017_226_MOESM7_ESM.pdf [file 12894_2017_226_MOESM7_ESM.pdf]

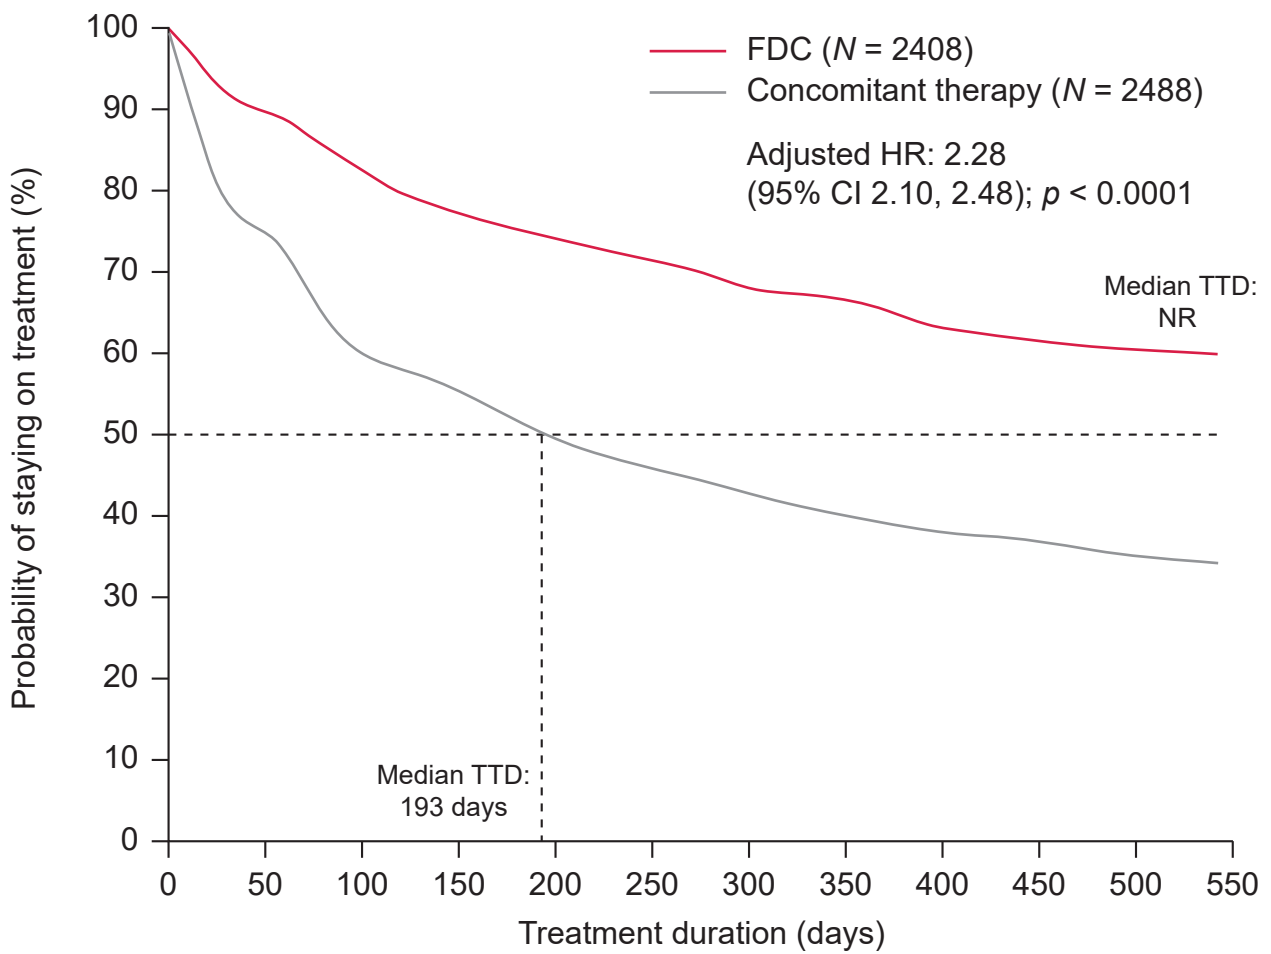

**Figure S3.** Median time to discontinuation in any FDC\* compared with any concomitant therapy\*.  
 \* $\alpha$ -blocker plus an antimuscarinic or 5-ARI. 5-ARI: 5 $\alpha$ -reductase inhibitor; CI: confidence intervals;  
 FDC: fixed-dose combination; HR: hazard ratio; NR: not reached; TTD: time to discontinuation
